# Supplementary material
Source: MDPI journal article supplement (https://www.mdpi.com/1999-4907/11/2/149)
Supplement: s1 [file s1]

a)

Importance of components :

|                        | PC1    | PC2    | PC3    | PC4    |
|------------------------|--------|--------|--------|--------|
| Standard deviation     | 1.9407 | 1.2724 | 1.1934 | 1.0563 |
| Proportion of variance | 0.3139 | 0.1349 | 0.1187 | 0.0930 |
| Cumulative proportion  | 0.3139 | 0.4488 | 0.5675 | 0.6604 |

b)

| Variables | PC1           | PC2           | PC3            | PC4            |
|-----------|---------------|---------------|----------------|----------------|
| BGL       | <b>0.8474</b> | -0.0607       | 0.3182         | -0.0614        |
| NAG       | <b>0.8279</b> | -0.0241       | 0.3481         | 0.0095         |
| PHO       | <b>0.8958</b> | -0.0171       | 0.1409         | 0.0855         |
| resp0     | <b>0.7358</b> | -0.0122       | -0.3877        | 0.1873         |
| resp      | <b>0.7379</b> | -0.1002       | -0.5414        | 0.1114         |
| ndvi      | 0.2707        | <b>0.7415</b> | 0.0037         | 0.0218         |
| vert      | -0.2508       | <b>0.6285</b> | -0.1677        | -0.1029        |
| adn       | 0.2312        | <b>0.5590</b> | 0.2447         | 0.4650         |
| Ni        | 0.1934        | 0.3027        | <b>-0.3667</b> | -0.1262        |
| N         | -0.3248       | 0.2505        | <b>0.5448</b>  | 0.2665         |
| P         | 0.3469        | -0.1212       | 0.4619         | <b>-0.5165</b> |
| canope    | -0.147        | -0.422        | 0.0770         | <b>0.6899</b>  |
