# Supplementary material
Source: MDPI journal article supplement (https://www.mdpi.com/1999-4907/11/2/149)
Supplement: s1 [file s1]

a)

**Importance of components :**

|                               | <b>PC1</b> | <b>PC2</b> | <b>PC3</b> |
|-------------------------------|------------|------------|------------|
| <b>Standard deviation</b>     | 2.4168     | 1.8899     | 1.3146     |
| <b>Proportion of variance</b> | 0.4172     | 0.2551     | 0.1234     |
| <b>Cumulative proportion</b>  | 0.4172     | 0.6724     | 0.7958     |

b)

| <b>Variables</b> | <b>PC1</b>     | <b>PC2</b>     | <b>PC3</b>     |
|------------------|----------------|----------------|----------------|
| WHC              | <b>-0.8986</b> | -0.3582        | -0.0324        |
| T_eau            | <b>-0.7956</b> | -0.3393        | 0.0601         |
| Poros            | <b>-0.6942</b> | -0.3375        | -0.0848        |
| WFP              | <b>-0.8911</b> | -0.3697        | -0.0634        |
| pH               | <b>0.6408</b>  | 0.3518         | 0.2809         |
| Mo               | <b>-0.9356</b> | -0.2644        | 0.0244         |
| Limon            | <b>-0.7814</b> | -0.0313        | 0.3813         |
| TEMP_MOY         | 0.4866         | <b>-0.7744</b> | -0.0528        |
| DJ_0             | 0.5110         | <b>-0.8349</b> | 0.1366         |
| SC               | 0.4523         | <b>-0.7706</b> | 0.3182         |
| SGEL4            | 0.4721         | <b>-0.8333</b> | 0.1844         |
| PPT              | -0.0076        | 0.1755         | <b>-0.7006</b> |
| Eh               | 0.0969         | 0.4383         | <b>0.7215</b>  |
| Argile           | -0.5418        | 0.2743         | <b>0.5651</b>  |
