# Supplementary material
Source: MDPI journal article supplement (https://www.mdpi.com/1999-4907/11/2/149)
Supplement: s1 [file s1]

| lhs       | op | rhs       | est        | se        | z          | pvalue    | ci.lower   | ci.upper   | std.lv     | std.all    | std.nox    |
|-----------|----|-----------|------------|-----------|------------|-----------|------------|------------|------------|------------|------------|
| multifunc | -  | meanb     | 0.2094058  | 0.0647963 | 3.2317566  | 0.0012303 | 0.0824074  | 0.3364042  | 0.2094058  | 0.2170159  | 0.2170159  |
| multifunc | -  | totF      | -0.0716699 | 0.0611606 | -1.1718308 | 0.2412650 | -0.1915425 | 0.0482027  | -0.0716699 | -0.0744372 | -0.0744372 |
| multifunc | -  | ED1       | -0.5543427 | 0.0631507 | -8.7780858 | 0.0000000 | -0.6781159 | -0.4305695 | -0.5543427 | -0.5785837 | -0.5806318 |
| multifunc | -  | ED2       | -0.0936318 | 0.0607054 | -1.5423956 | 0.1229775 | -0.2126123 | 0.0253487  | -0.0936318 | -0.0977263 | -0.0980722 |
| meanb     | -  | ED1       | -0.4342963 | 0.0696710 | -6.2335308 | 0.0000000 | -0.5708489 | -0.2977437 | -0.4342963 | -0.4373924 | -0.4389407 |
| meanb     | -  | ED2       | 0.1545598  | 0.0696754 | 2.2182848  | 0.0265354 | 0.0179986  | 0.2911211  | 0.1545598  | 0.1556617  | 0.1562127  |
| meanb     | -  | ED3       | -0.3019790 | 0.0696739 | -4.3341793 | 0.0000146 | -0.4385373 | -0.1654208 | -0.3019790 | -0.3041319 | -0.3052084 |
| totF      | -  | ED1       | 0.0227387  | 0.0722410 | 0.3147621  | 0.7529423 | -0.1188511 | 0.1643286  | 0.0227387  | 0.0228508  | 0.0229317  |
| totF      | -  | ED2       | -0.3444964 | 0.0722456 | -4.7684066 | 0.0000019 | -0.4860951 | -0.2028976 | -0.3444964 | -0.3461939 | -0.3474193 |
| totF      | -  | ED3       | 0.3673569  | 0.0722440 | 5.0849448  | 0.0000004 | 0.2257612  | 0.5089525  | 0.3673569  | 0.3691670  | 0.3704738  |
| multifunc | -- | multifunc | 0.4535457  | 0.0538260 | 8.4261498  | 0.0000000 | 0.3480487  | 0.5590426  | 0.4535457  | 0.4975835  | 0.4975835  |
| meanb     | -- | meanb     | 0.6841670  | 0.0811957 | 8.4261498  | 0.0000000 | 0.5250264  | 0.8433077  | 0.6841670  | 0.6988783  | 0.6988783  |
| totF      | -- | totF      | 0.7355736  | 0.0872965 | 8.4261498  | 0.0000000 | 0.5644755  | 0.9066716  | 0.7355736  | 0.7481088  | 0.7481088  |
| ED1       | -- | ED1       | 0.9929577  | 0.0000000 | NA         | NA        | 0.9929577  | 0.9929577  | 0.9929577  | 1.0000000  | 0.9929577  |
| ED1       | -- | ED2       | 0.0141815  | 0.0000000 | NA         | NA        | 0.0141815  | 0.0141815  | 0.0141815  | 0.0142821  | 0.0141815  |
| ED1       | -- | ED3       | -0.0125777 | 0.0000000 | NA         | NA        | -0.0125777 | -0.0125777 | -0.0125777 | -0.0126669 | -0.0125777 |
| ED2       | -- | ED2       | 0.9929577  | 0.0000000 | NA         | NA        | 0.9929577  | 0.9929577  | 0.9929577  | 1.0000000  | 0.9929577  |
| ED2       | -- | ED3       | 0.0168044  | 0.0000000 | NA         | NA        | 0.0168044  | 0.0168044  | 0.0168044  | 0.0169236  | 0.0168044  |
| ED3       | -- | ED3       | 0.9929577  | 0.0000000 | NA         | NA        | 0.9929577  | 0.9929577  | 0.9929577  | 1.0000000  | 0.9929577  |
| multifunc | r2 | multifunc | 0.5024165  | NA        | NA         | NA        | NA         | NA         | NA         | NA         | NA         |
| meanb     | r2 | meanb     | 0.3011217  | NA        | NA         | NA        | NA         | NA         | NA         | NA         | NA         |
| totF      | r2 | totF      | 0.2518912  | NA        | NA         | NA        | NA         | NA         | NA         | NA         | NA         |
