# Supplementary material
Source: MDPI journal article supplement (https://www.mdpi.com/1999-4907/11/2/149)
Supplement: s1 [file s1]

| lhs  | op | rhs  | est        | se        | z           | pvalue    | ci.lower   | ci.upper   | std.lv     | std.all    | std.nox    |
|------|----|------|------------|-----------|-------------|-----------|------------|------------|------------|------------|------------|
| FD1  | -  | totB | -0.0865512 | 0.0468626 | -1.8469152  | 0.0647594 | -0.1784001 | 0.0052978  | -0.0865512 | -0.0865512 | -0.0865512 |
| FD1  | -  | mean | 0.0091551  | 0.0525839 | 0.1741052   | 0.8617828 | -0.0939074 | 0.1122177  | 0.0091551  | 0.0091551  | 0.0091551  |
| FD1  | -  | ED1  | -0.6632761 | 0.0502706 | -13.1941104 | 0.0000000 | -0.7618047 | -0.5647475 | -0.6632761 | -0.6632761 | -0.6656240 |
| FD1  | -  | ED2  | -0.5061705 | 0.0454021 | -11.1486094 | 0.0000000 | -0.5951571 | -0.4171840 | -0.5061705 | -0.5061705 | -0.5079623 |
| FD1  | -  | ED3  | 0.2376875  | 0.0481591 | 4.9354618   | 0.0000008 | 0.1432974  | 0.3320777  | 0.2376875  | 0.2376875  | 0.2385289  |
| FD2  | -  | totB | 0.1715259  | 0.0781777 | 2.1940508   | 0.0282318 | 0.0183004  | 0.3247513  | 0.1715259  | 0.1715259  | 0.1715259  |
| FD2  | -  | mean | 0.3036984  | 0.0877223 | 3.4620451   | 0.0005361 | 0.1317659  | 0.4756309  | 0.3036984  | 0.3036984  | 0.3036984  |
| FD2  | -  | ED1  | -0.0785920 | 0.0838631 | -0.9371455  | 0.3486837 | -0.2429607 | 0.0857768  | -0.0785920 | -0.0785920 | -0.0788702 |
| FD2  | -  | ED2  | 0.2017678  | 0.0757414 | 2.6639052   | 0.0077239 | 0.0533175  | 0.3502182  | 0.2017678  | 0.2017678  | 0.2024820  |
| FD2  | -  | ED3  | 0.2330658  | 0.0803407 | 2.9009687   | 0.0037201 | 0.0756010  | 0.3905307  | 0.2330658  | 0.2330658  | 0.2338908  |
| FD3  | -  | totB | -0.0482141 | 0.0710149 | -0.6789295  | 0.4971825 | -0.1874008 | 0.0909725  | -0.0482141 | -0.0482141 | -0.0482141 |
| FD3  | -  | mean | 0.1972905  | 0.0796850 | 2.4758805   | 0.0132908 | 0.0411108  | 0.3534701  | 0.1972905  | 0.1972905  | 0.1972905  |
| FD3  | -  | ED1  | -0.3076340 | 0.0761794 | -4.0382807  | 0.0000538 | -0.4569429 | -0.1583250 | -0.3076340 | -0.3076340 | -0.3087229 |
| FD3  | -  | ED2  | 0.2326381  | 0.0688018 | 3.3812799   | 0.0007215 | 0.0977891  | 0.3674871  | 0.2326381  | 0.2326381  | 0.2334616  |
| FD3  | -  | ED3  | -0.2895632 | 0.0729797 | -3.9677223  | 0.0000726 | -0.4326008 | -0.1465256 | -0.2895632 | -0.2895632 | -0.2905882 |
| FD4  | -  | mean | -0.0223637 | 0.0959087 | -0.2331771  | 0.8156239 | -0.2103414 | 0.1656140  | -0.0223637 | -0.0223637 | -0.0223637 |
| FD4  | -  | ED1  | -0.0808315 | 0.0916458 | -0.8819986  | 0.3777775 | -0.2604540 | 0.0987910  | -0.0808315 | -0.0808315 | -0.0811176 |
| FD4  | -  | ED3  | -0.2287952 | 0.0865548 | -2.6433579  | 0.0082088 | -0.3984395 | -0.0591510 | -0.2287952 | -0.2287952 | -0.2296051 |
| totB | -  | ED1  | -0.1963370 | 0.0787965 | -2.4916954  | 0.0127135 | -0.3507754 | -0.0418986 | -0.1963370 | -0.1963370 | -0.1970320 |
| totB | -  | ED2  | -0.1607825 | 0.0788015 | -2.0403480  | 0.0413157 | -0.3152306 | -0.0063344 | -0.1607825 | -0.1607825 | -0.1613516 |
| totB | -  | ED3  | 0.2312381  | 0.0787998 | 2.9345020   | 0.0033408 | 0.0767934  | 0.3856829  | 0.2312381  | 0.2312381  | 0.2320567  |
| mean | -  | ED1  | -0.4369587 | 0.0702231 | -6.2224313  | 0.0000000 | -0.5745935 | -0.2993238 | -0.4369587 | -0.4369587 | -0.4385054 |
| mean | -  | ED2  | 0.1549784  | 0.0702276 | 2.2068026   | 0.0273279 | 0.0173349  | 0.2926219  | 0.1549784  | 0.1549784  | 0.1555270  |
| mean | -  | ED3  | -0.3032275 | 0.0702260 | -4.3178792  | 0.0000158 | -0.4408680 | -0.1655870 | -0.3032275 | -0.3032275 | -0.3043009 |
| totB | -- | mean | 0.0334318  | 0.0655088 | 0.5103401   | 0.6098132 | -0.0949632 | 0.1618268  | 0.0334318  | 0.0428661  | 0.0428661  |
| FD1  | -- | FD4  | 0.0000000  | 0.0000000 | NA          | NA        | 0.0000000  | 0.0000000  | 0.0000000  | 0.0000000  | 0.0000000  |
| FD2  | -- | FD4  | 0.0000000  | 0.0000000 | NA          | NA        | 0.0000000  | 0.0000000  | 0.0000000  | 0.0000000  | 0.0000000  |
| FD3  | -- | FD4  | 0.0000000  | 0.0000000 | NA          | NA        | 0.0000000  | 0.0000000  | 0.0000000  | 0.0000000  | 0.0000000  |
| FD1  | -- | FD1  | 0.2724043  | 0.0323284 | 8.4261498   | 0.0000000 | 0.2090417  | 0.3357669  | 0.2724043  | 0.2743362  | 0.2743362  |
| FD2  | -- | FD2  | 0.7581023  | 0.0899702 | 8.4261498   | 0.0000000 | 0.5817640  | 0.9344406  | 0.7581023  | 0.7634789  | 0.7634789  |
| FD3  | -- | FD3  | 0.6255485  | 0.0742390 | 8.4261498   | 0.0000000 | 0.4800429  | 0.7710542  | 0.6255485  | 0.6299851  | 0.6299851  |
| FD4  | -- | FD4  | 0.9390052  | 0.1114394 | 8.4261498   | 0.0000000 | 0.7205880  | 1.1574225  | 0.9390052  | 0.9456649  | 0.9456649  |
| totB | -- | totB | 0.8751296  | 0.1038588 | 8.4261498   | 0.0000000 | 0.6715702  | 1.0786891  | 0.8751296  | 0.8813362  | 0.8813362  |
| mean | -- | mean | 0.6950541  | 0.0824877 | 8.4261498   | 0.0000000 | 0.5333811  | 0.8567271  | 0.6950541  | 0.6999835  | 0.6999835  |
| FD1  | -- | FD2  | -0.0647768 | 0.0385207 | -1.6816073  | 0.0926450 | -0.1402760 | 0.0107225  | -0.0647768 | -0.1425438 | -0.1425438 |
| FD1  | -- | FD3  | -0.0983873 | 0.0356116 | -2.7627893  | 0.0057310 | -0.1681847 | -0.0285899 | -0.0983873 | -0.2383425 | -0.2383425 |
| FD2  | -- | FD3  | -0.1672907 | 0.0594704 | -2.8130072  | 0.0049081 | -0.2838507 | -0.0507308 | -0.1672907 | -0.2429280 | -0.2429280 |
| ED1  | -- | ED1  | 0.9929577  | 0.0000000 | NA          | NA        | 0.9929577  | 0.9929577  | 0.9929577  | 1.0000000  | 0.9929577  |
| ED1  | -- | ED2  | 0.0141815  | 0.0000000 | NA          | NA        | 0.0141815  | 0.0141815  | 0.0141815  | 0.0142821  | 0.0141815  |
| ED1  | -- | ED3  | -0.0125777 | 0.0000000 | NA          | NA        | -0.0125777 | -0.0125777 | -0.0125777 | -0.0126669 | -0.0125777 |
| ED2  | -- | ED2  | 0.9929577  | 0.0000000 | NA          | NA        | 0.9929577  | 0.9929577  | 0.9929577  | 1.0000000  | 0.9929577  |
| ED2  | -- | ED3  | 0.0168044  | 0.0000000 | NA          | NA        | 0.0168044  | 0.0168044  | 0.0168044  | 0.0169236  | 0.0168044  |
| ED3  | -- | ED3  | 0.9929577  | 0.0000000 | NA          | NA        | 0.9929577  | 0.9929577  | 0.9929577  | 1.0000000  | 0.9929577  |
| FD1  | r2 | FD1  | 0.7256638  | NA        | NA          | NA        | NA         | NA         | NA         | NA         | NA         |
| FD2  | r2 | FD2  | 0.2365211  | NA        | NA          | NA        | NA         | NA         | NA         | NA         | NA         |
| FD3  | r2 | FD3  | 0.3700149  | NA        | NA          | NA        | NA         | NA         | NA         | NA         | NA         |
| FD4  | r2 | FD4  | 0.0543351  | NA        | NA          | NA        | NA         | NA         | NA         | NA         | NA         |
| totB | r2 | totB | 0.1186638  | NA        | NA          | NA        | NA         | NA         | NA         | NA         | NA         |
| mean | r2 | mean | 0.3000165  | NA        | NA          | NA        | NA         | NA         | NA         | NA         | NA         |
