# Supplementary material
Source: MDPI journal article supplement (https://www.mdpi.com/1999-4907/11/2/149)
Supplement: s1 [file s1]

| Models                                                              | D <sup>2</sup>       | R <sup>2</sup> m    | R <sup>2</sup> c |
|---------------------------------------------------------------------|----------------------|---------------------|------------------|
| FD1 ~ aF                                                            | 0.07                 |                     |                  |
| FD1 ~ aF + (1   Essence) + (1   Age) + (1   Depot) + (1   Drainage) |                      | 0.03                | 0.35             |
| FD2 ~ aF                                                            | 3.14e <sup>-05</sup> |                     |                  |
| FD2 ~ aF + (1   Essence) + (1   Age) + (1   Depot) + (1   Drainage) |                      | 0.009               | 0.32             |
| FD3 ~ aF                                                            | 0.08                 |                     |                  |
| FD3 ~ aF + (1   Essence) + (1   Age) + (1   Depot) + (1   Drainage) |                      | 0.03                | 0.45             |
| FD4 ~ aF                                                            | 0.02                 |                     |                  |
| FD4 ~ aF + (1   Essence) + (1   Age) + (1   Depot) + (1   Drainage) |                      | 0.01                | 0.18             |
| FD1 ~ aB                                                            | 0.03                 |                     |                  |
| FD1 ~ aB + (1   Essence) + (1   Age) + (1   Depot) + (1   Drainage) |                      | 0.02                | 0.36             |
| FD2 ~ aB                                                            | 0.06                 |                     |                  |
| FD2 ~ aB + (1   Essence) + (1   Age) + (1   Depot) + (1   Drainage) |                      | 0.02                | 0.30             |
| FD3 ~ aB                                                            | 0.008                |                     |                  |
| FD3 ~ aB + (1   Essence) + (1   Age) + (1   Depot) + (1   Drainage) |                      | 0.02                | 0.49             |
| FD4 ~ aB                                                            | 1.49e <sup>-05</sup> |                     |                  |
| FD4 ~ aB + (1   Essence) + (1   Age) + (1   Depot) + (1   Drainage) |                      | 7.1e <sup>-06</sup> | 0.19             |
| FD1 ~ bF                                                            | 0.04                 |                     |                  |
| FD1 ~ bF + (1   Essence) + (1   Age) + (1   Depot) + (1   Drainage) |                      | 0.02                | 0.37             |
| FD2 ~ bF                                                            | 0.003                |                     |                  |
| FD2 ~ bF + (1   Essence) + (1   Age) + (1   Depot) + (1   Drainage) |                      | 0.0001              | 0.30             |
| FD3 ~ bF                                                            | 0.001                |                     |                  |
| FD3 ~ bF + (1   Essence) + (1   Age) + (1   Depot) + (1   Drainage) |                      | 0.001               | 0.45             |
| FD4 ~ bF                                                            | 0.01                 |                     |                  |
| FD4 ~ bF + (1   Essence) + (1   Age) + (1   Depot) + (1   Drainage) |                      | 0.0005              | 0.19             |
| FD1 ~ bB                                                            | 0.03                 |                     |                  |
| FD1 ~ bB + (1   Essence) + (1   Age) + (1   Depot) + (1   Drainage) |                      | 0.03                | 0.41             |
| FD2 ~ bB                                                            | 0.08                 |                     |                  |
| FD2 ~ bB + (1   Essence) + (1   Age) + (1   Depot) + (1   Drainage) |                      | 0.04                | 0.29             |
| FD3 ~ bB                                                            | 0.21                 |                     |                  |
| FD3 ~ bB + (1   Essence) + (1   Age) + (1   Depot) + (1   Drainage) |                      | 0.10                | 0.41             |
| FD4 ~ bB                                                            | 0.003                |                     |                  |
| FD4 ~ bB + (1   Essence) + (1   Age) + (1   Depot) + (1   Drainage) |                      | 0.02                | 0.22             |

- aF = Fungal alpha-diversity; aB = Bacterial alpha-diversity
- bF = Fungal beta-diversity; bB = Bacterial beta-diversity
- FDI = PCAs groups
- Essence = Dominant tree species
- Depot = Surface deposits
