# Supplementary material
Source: MDPI journal article supplement (https://www.mdpi.com/1999-4907/11/2/149)
Supplement: s1 [file s1]

| lhs  | op | rhs  | est        | se        | z           | pvalue    | ci.lower   | ci.upper   | std.lv     | std.all    | std.nox    |
|------|----|------|------------|-----------|-------------|-----------|------------|------------|------------|------------|------------|
| FD1  | -  | mean | 0.0722566  | 0.0446484 | 1.6183468   | 0.1055879 | -0.0152527 | 0.1597659  | 0.0722566  | 0.0722566  | 0.0722566  |
| FD1  | -  | ED1  | -0.6431618 | 0.0443027 | -14.5174342 | 0.0000000 | -0.7299936 | -0.5563301 | -0.6431618 | -0.6431618 | -0.6454385 |
| FD1  | -  | ED2  | -0.4842373 | 0.0442746 | -10.9371468 | 0.0000000 | -0.5710138 | -0.3974608 | -0.4842373 | -0.4842373 | -0.4859514 |
| FD1  | -  | ED3  | 0.2087493  | 0.0442488 | 4.7176218   | 0.0000024 | 0.1220232  | 0.2954755  | 0.2087493  | 0.2087493  | 0.2094883  |
| FD2  | -  | totF | -0.0815586 | 0.1099534 | -0.7417565  | 0.4582349 | -0.2970633 | 0.1339460  | -0.0815586 | -0.0815390 | -0.0815390 |
| FD2  | -  | mean | 0.1023130  | 0.0972532 | 1.0520272   | 0.2927871 | -0.0882998 | 0.2929258  | 0.1023130  | 0.1022884  | 0.1022884  |
| FD2  | -  | ED1  | -0.2330250 | 0.0782552 | -2.9777588  | 0.0029036 | -0.3864023 | -0.0796477 | -0.2330250 | -0.2329689 | -0.2337936 |
| FD2  | -  | ED2  | 0.2023643  | 0.0844159 | 2.3972302   | 0.0165195 | 0.0369122  | 0.3678163  | 0.2023643  | 0.2023155  | 0.2030317  |
| FD2  | -  | ED3  | 0.2020424  | 0.0855373 | 2.3620402   | 0.0181747 | 0.0343925  | 0.3696924  | 0.2020424  | 0.2019938  | 0.2027088  |
| FD3  | -  | totF | -0.2231790 | 0.0938798 | -2.3772862  | 0.0174405 | -0.4071800 | -0.0391781 | -0.2231790 | -0.2230089 | -0.2230089 |
| FD3  | -  | mean | 0.0913923  | 0.0836848 | 1.0921009   | 0.2747888 | -0.0726270 | 0.2554115  | 0.0913923  | 0.0913226  | 0.0913226  |
| FD3  | -  | ED1  | -0.3702682 | 0.0676075 | -5.4767335  | 0.0000000 | -0.5027765 | -0.2377600 | -0.3702682 | -0.3699859 | -0.3712956 |
| FD3  | -  | ED2  | 0.2020485  | 0.0728095 | 2.7750315   | 0.0055196 | 0.0593446  | 0.3447524  | 0.2020485  | 0.2018945  | 0.2026092  |
| FD3  | -  | ED3  | -0.2859223 | 0.0737565 | -3.8765677  | 0.0001059 | -0.4304824 | -0.1413621 | -0.2859223 | -0.2857043 | -0.2867156 |
| FD4  | -  | totF | -0.0186985 | 0.1078923 | -0.1733071  | 0.8624100 | -0.2301636 | 0.1927666  | -0.0186985 | -0.0186985 | -0.0186985 |
| FD4  | -  | mean | -0.0522598 | 0.1013876 | -0.5154460  | 0.6062414 | -0.2509759 | 0.1464562  | -0.0522598 | -0.0522598 | -0.0522598 |
| FD4  | -  | ED1  | -0.0759962 | 0.0822425 | -0.9240498  | 0.3554604 | -0.2371885 | 0.0851961  | -0.0759962 | -0.0759961 | -0.0762652 |
| FD4  | -  | ED3  | -0.2109161 | 0.0886196 | -2.3800161  | 0.0173119 | -0.3846073 | -0.0372248 | -0.2109161 | -0.2109160 | -0.2116627 |
| totF | -  | ED1  | 0.0228508  | 0.0725970 | 0.3147618   | 0.7529425 | -0.1194368 | 0.1651383  | 0.0228508  | 0.0228508  | 0.0229317  |
| totF | -  | ED2  | -0.3461940 | 0.0726016 | -4.7684079  | 0.0000019 | -0.4884904 | -0.2038975 | -0.3461940 | -0.3461940 | -0.3474194 |
| totF | -  | ED3  | 0.3691669  | 0.0726000 | 5.0849436   | 0.0000004 | 0.2268735  | 0.5114603  | 0.3691669  | 0.3691669  | 0.3704737  |
| mean | -  | ED1  | -0.0985582 | 0.0828566 | -1.1895026  | 0.2342419 | -0.2609542 | 0.0638378  | -0.0985582 | -0.0985582 | -0.0989071 |
| mean | -  | ED2  | -0.0913199 | 0.0828619 | -1.1020737  | 0.2704297 | -0.2537261 | 0.0710864  | -0.0913199 | -0.0913199 | -0.0916431 |
| mean | -  | ED3  | 0.0850888  | 0.0828601 | 1.0268983   | 0.3044684 | -0.0773139 | 0.2474916  | 0.0850888  | 0.0850888  | 0.0853900  |
| totF | -- | mean | 0.5060312  | 0.0828569 | 6.1072907   | 0.0000000 | 0.3436347  | 0.6684278  | 0.5060312  | 0.5968610  | 0.5968610  |
| FD1  | -- | FD4  | 0.0000000  | 0.0000000 | NA          | NA        | 0.0000000  | 0.0000000  | 0.0000000  | 0.0000000  | 0.0000000  |
| FD2  | -- | FD4  | 0.0000000  | 0.0000000 | NA          | NA        | 0.0000000  | 0.0000000  | 0.0000000  | 0.0000000  | 0.0000000  |
| FD3  | -- | FD4  | 0.0000000  | 0.0000000 | NA          | NA        | 0.0000000  | 0.0000000  | 0.0000000  | 0.0000000  | 0.0000000  |
| FD1  | -- | FD1  | 0.2739132  | 0.0325075 | 8.4261498   | 0.0000000 | 0.2101996  | 0.3376267  | 0.2739132  | 0.2758558  | 0.2758558  |
| FD2  | -- | FD2  | 0.8452927  | 0.1003178 | 8.4261498   | 0.0000000 | 0.6486735  | 1.0419120  | 0.8452927  | 0.8508776  | 0.8508776  |
| FD3  | -- | FD3  | 0.6310772  | 0.0748951 | 8.4261498   | 0.0000000 | 0.4842855  | 0.7778688  | 0.6310772  | 0.6345842  | 0.6345842  |
| FD4  | -- | FD4  | 0.9353480  | 0.1110054 | 8.4261498   | 0.0000000 | 0.7177814  | 1.1529145  | 0.9353480  | 0.9419815  | 0.9419815  |
| totF | -- | totF | 0.7428405  | 0.0881589 | 8.4261498   | 0.0000000 | 0.5700521  | 0.9156288  | 0.7428405  | 0.7481088  | 0.7481088  |
| mean | -- | mean | 0.9676376  | 0.1148375 | 8.4261498   | 0.0000000 | 0.7425604  | 1.1927149  | 0.9676376  | 0.9745003  | 0.9745003  |
| FD1  | -- | FD2  | -0.0816367 | 0.0409570 | -1.9932307  | 0.0462362 | -0.1619109 | -0.0013625 | -0.0816367 | -0.1696584 | -0.1696584 |
| FD1  | -- | FD3  | -0.0944921 | 0.0357800 | -2.6409230  | 0.0082681 | -0.1646195 | -0.0243647 | -0.0944921 | -0.2272730 | -0.2272730 |
| FD2  | -- | FD3  | -0.1385518 | 0.0623846 | -2.2209282  | 0.0263558 | -0.2608234 | -0.0162802 | -0.1385518 | -0.1897000 | -0.1897000 |
| ED1  | -- | ED1  | 0.9929577  | 0.0000000 | NA          | NA        | 0.9929577  | 0.9929577  | 0.9929577  | 1.0000000  | 0.9929577  |
| ED1  | -- | ED2  | 0.0141815  | 0.0000000 | NA          | NA        | 0.0141815  | 0.0141815  | 0.0141815  | 0.0142821  | 0.0141815  |
| ED1  | -- | ED3  | -0.0125777 | 0.0000000 | NA          | NA        | -0.0125777 | -0.0125777 | -0.0125777 | -0.0126669 | -0.0125777 |
| ED2  | -- | ED2  | 0.9929577  | 0.0000000 | NA          | NA        | 0.9929577  | 0.9929577  | 0.9929577  | 1.0000000  | 0.9929577  |
| ED2  | -- | ED3  | 0.0168044  | 0.0000000 | NA          | NA        | 0.0168044  | 0.0168044  | 0.0168044  | 0.0169236  | 0.0168044  |
| ED3  | -- | ED3  | 0.9929577  | 0.0000000 | NA          | NA        | 0.9929577  | 0.9929577  | 0.9929577  | 1.0000000  | 0.9929577  |
| FD1  | r2 | FD1  | 0.7241442  | NA        | NA          | NA        | NA         | NA         | NA         | NA         | NA         |
| FD2  | r2 | FD2  | 0.1491224  | NA        | NA          | NA        | NA         | NA         | NA         | NA         | NA         |
| FD3  | r2 | FD3  | 0.3654158  | NA        | NA          | NA        | NA         | NA         | NA         | NA         | NA         |
| FD4  | r2 | FD4  | 0.0580185  | NA        | NA          | NA        | NA         | NA         | NA         | NA         | NA         |
| totF | r2 | totF | 0.2518912  | NA        | NA          | NA        | NA         | NA         | NA         | NA         | NA         |
| mean | r2 | mean | 0.0254997  | NA        | NA          | NA        | NA         | NA         | NA         | NA         | NA         |
