# Supplementary material
Source: MDPI journal article supplement (https://www.mdpi.com/1999-4907/11/2/149)

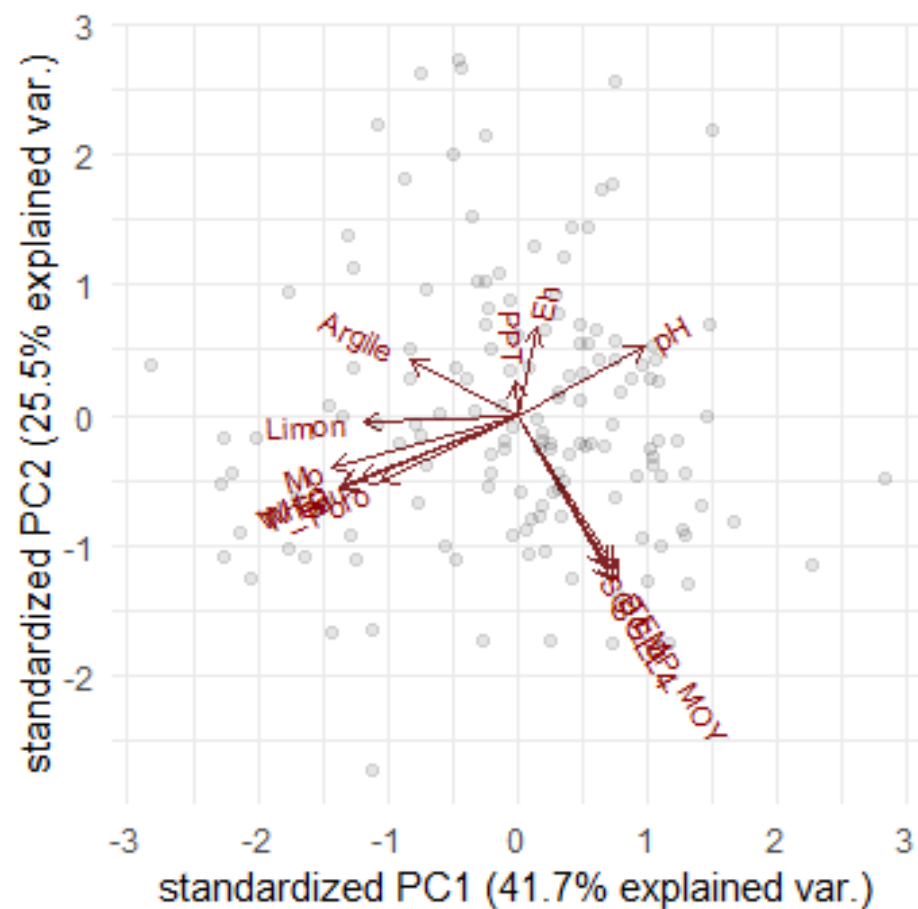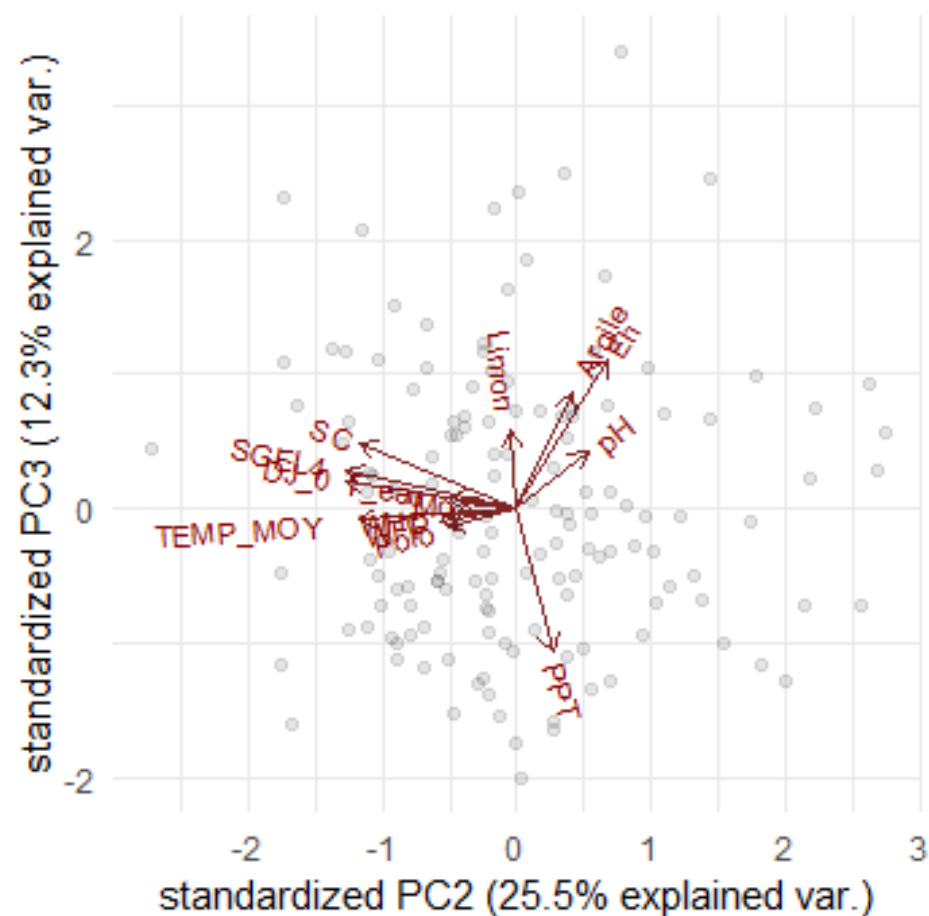

Supplement: s1 [file s1]

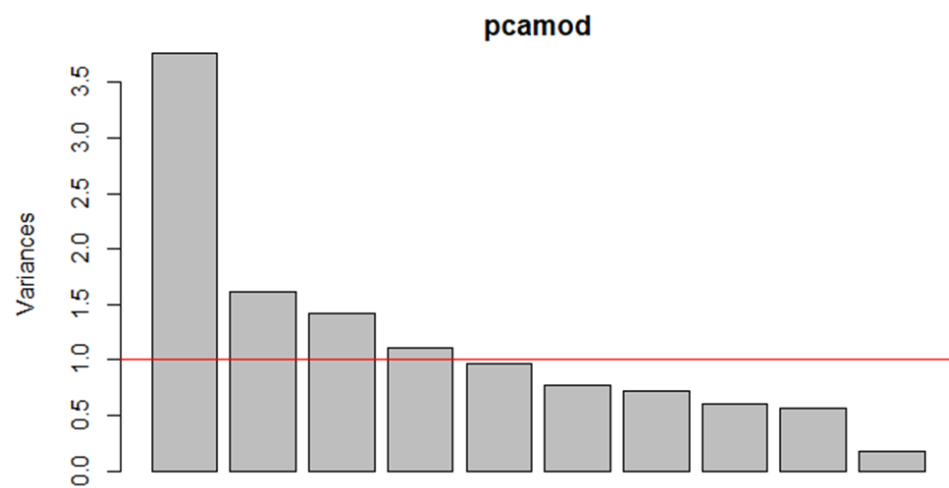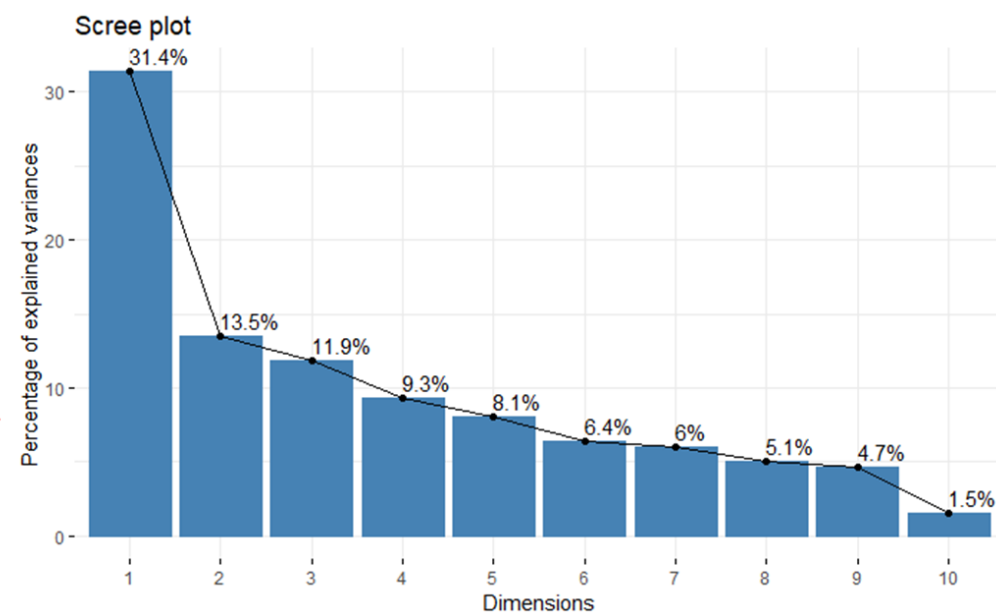

Supplement: s1 [file s1]

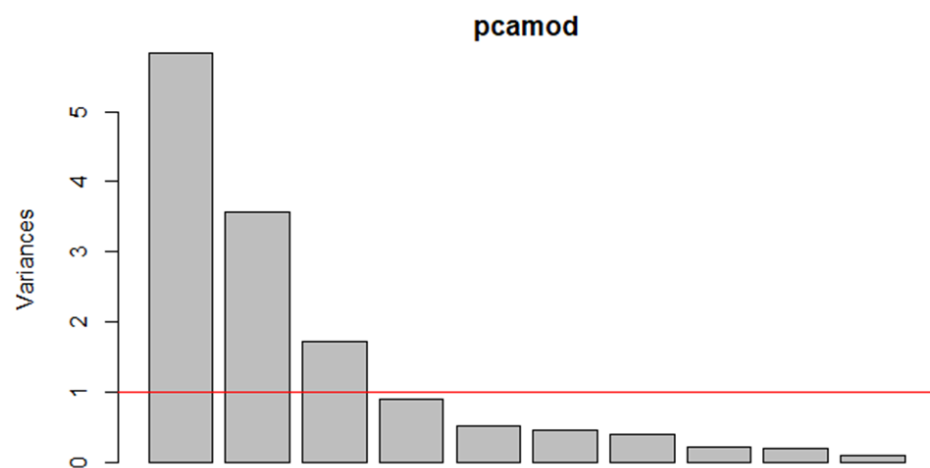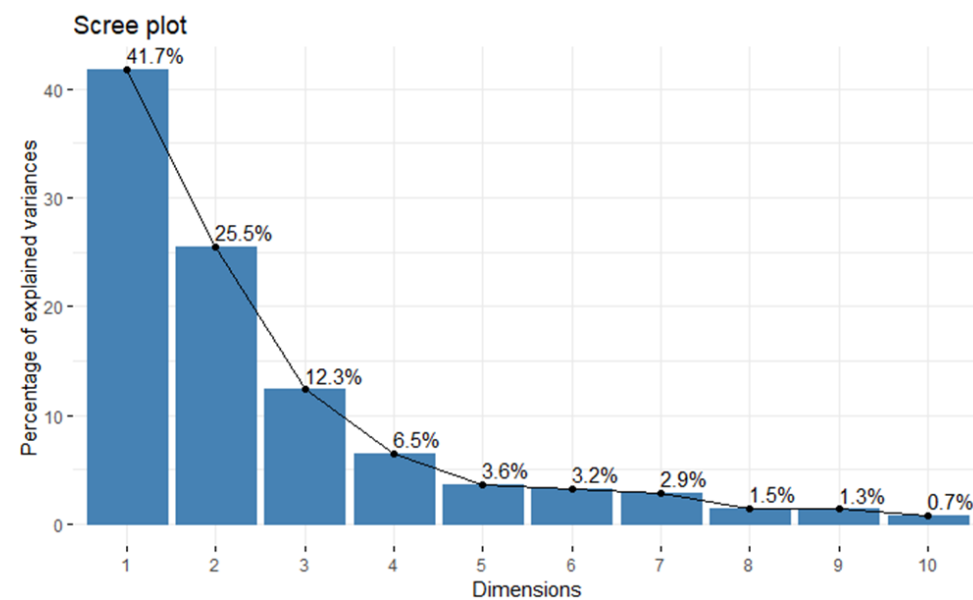

Supplement: s1 [file s1]

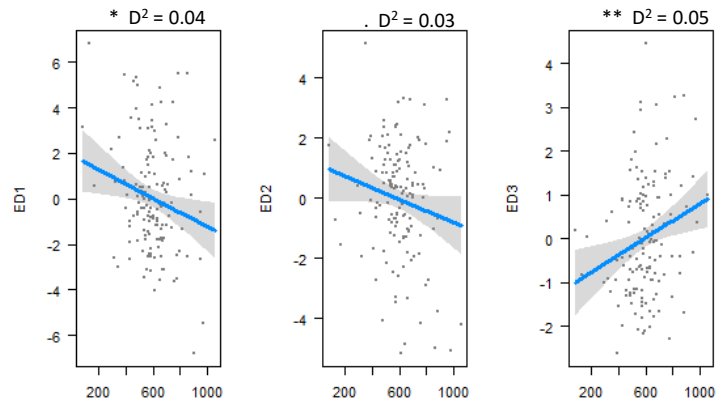

**Bacterial  $\alpha$ -Diversity**

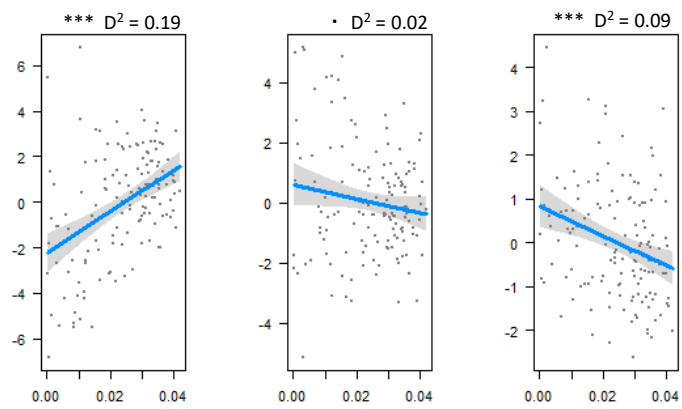

**(Bacterial  $\beta$ -Diversity) $^\lambda$**

Supplement: s1 [file s1]

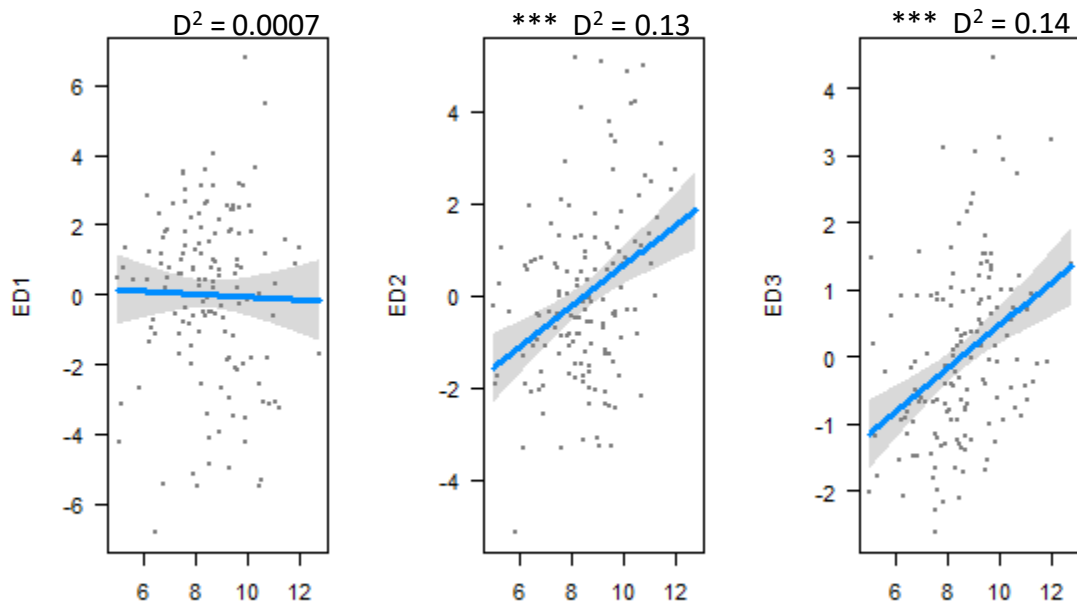

**(Fungi  $\alpha$ -Diversity) $^{\lambda}$**

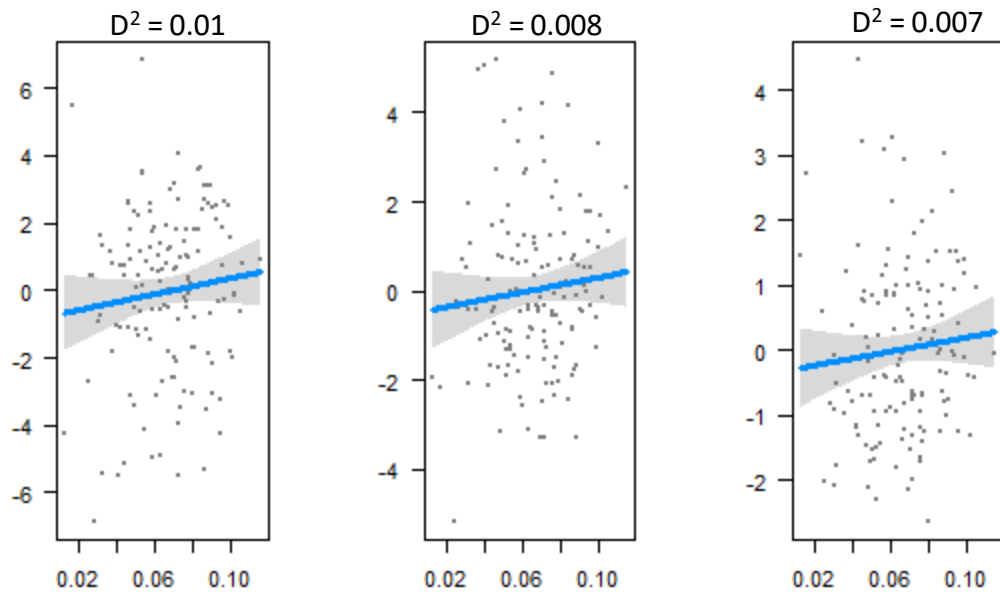

**Fungi  $\beta$ -Diversity**

Supplement: s1 [file s1]
